# Supplementary material for: Urea impairs β cell glycolysis and insulin secretion in chronic kidney disease
Source: JCI journal article supplement (doi:10.1172/jci86181), 2016-08-14
Supplement: sd1 [file 1]

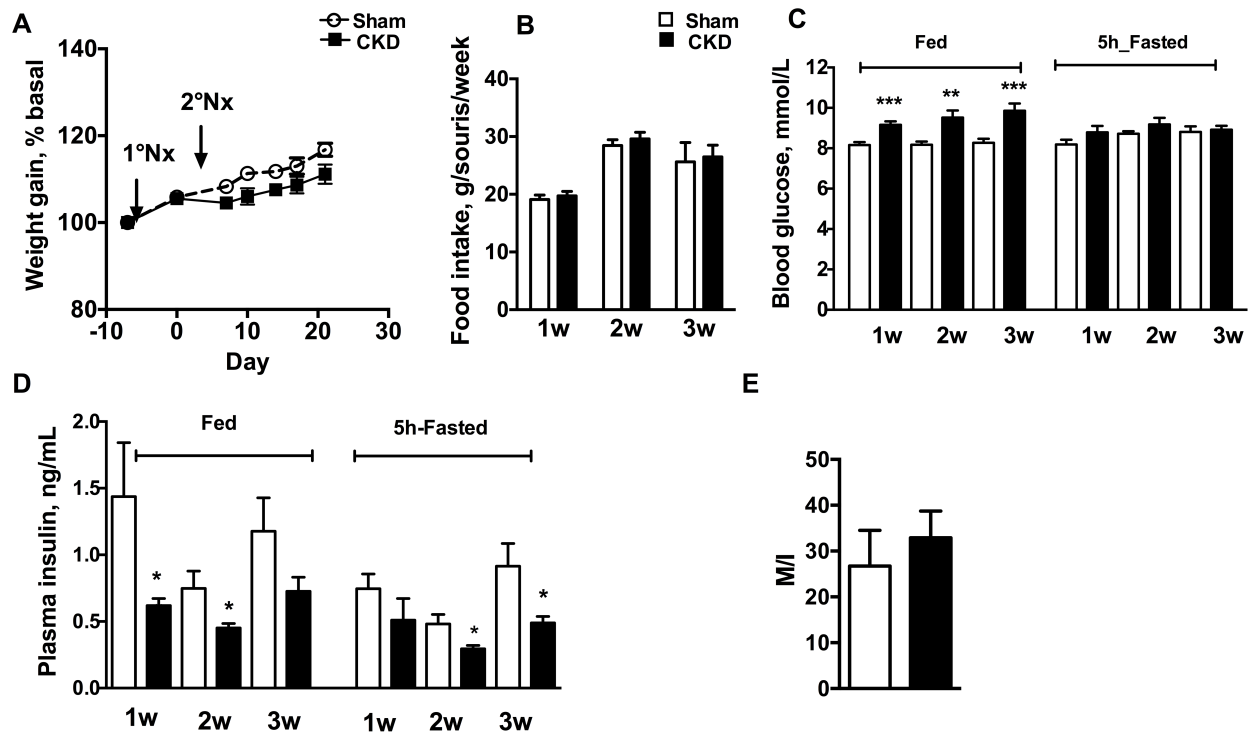

**Figure S1: Body weight, food intake and metabolic parameters in sham and CKD mice (A)** Weight gain (n=32-36). **(B)** Food intake (n=22-35). **(C)** Fed and 5h-fasting blood glucose (n=10-20) and **(D)** plasma insulin (n=5-11). **(E)** M/I index during hyperglycemic clamp (n=7). Data are mean  $\pm$  S.E.M., \*p<0.05, \*\*p<0.01, \*\*\*p<0.001 vs. sham; two-way ANOVA Bonferroni post hoc test for A, B, C and D and unpaired two-tailed Student's *t* test for E.

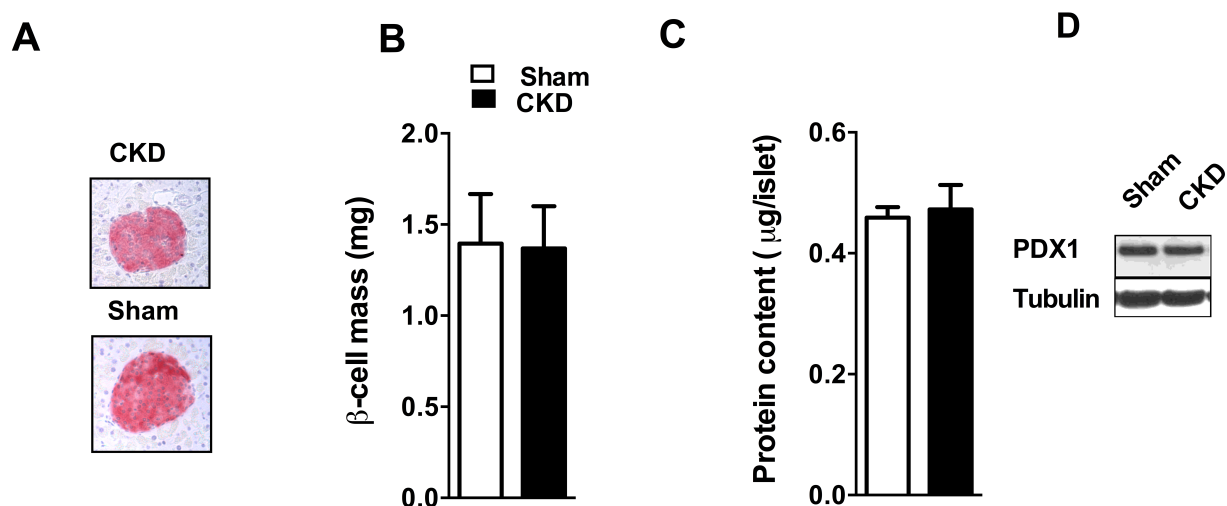

**Figure S2:  $\beta$ -cell mass and protein content in islets from sham and CKD mice at 3 weeks post-surgery.** (A) Representative pancreatic sections stained for insulin (B)  $\beta$ -cell mass measured in pancreatic sections by insulin immunostaining and morphometric analysis (n=3-4). (C) Protein content in sham and CKD islets (n=4). (D) Representative Western Blot for PDX-1 CKD islets (n=2). Data are mean  $\pm$  S.E.M., unpaired two-tailed Student's *t* test.

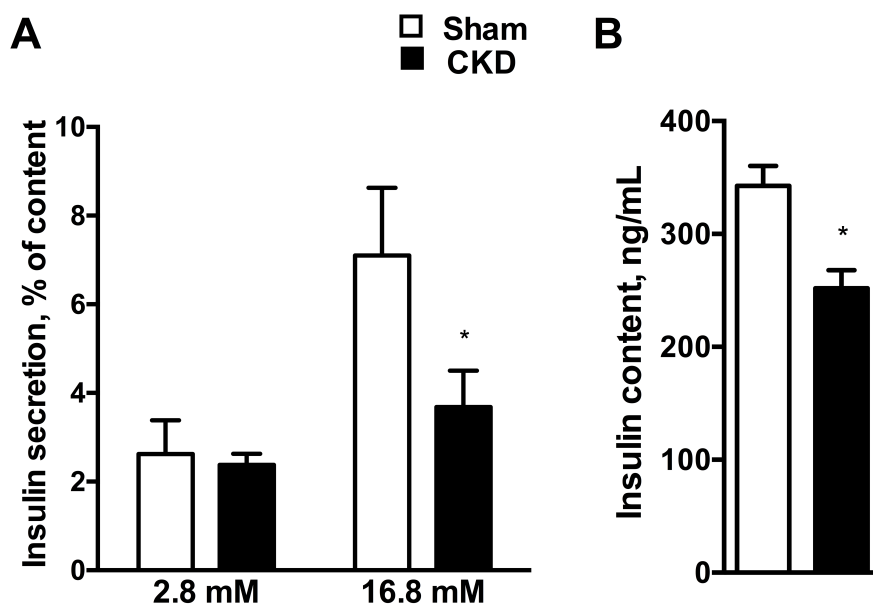

**Figure S3: Insulin secretion in isolated islets from CKD and sham mice at 6 weeks post-surgery.** (A) Insulin secretion, shown as % insulin content, was assessed in 1-h static incubations in islets isolated from CKD and sham-operated mice in response to 2.8 or 16.8 mmol/L (mM) glucose 6 weeks after surgery. (B) Total islet insulin content. Data are mean  $\pm$  S.E.M from 4-5 mice in each group. \**p*<0.05 vs. control for the same incubation condition by one-way ANOVA Bonferroni post hoc test for A and Student's *t* test for B.

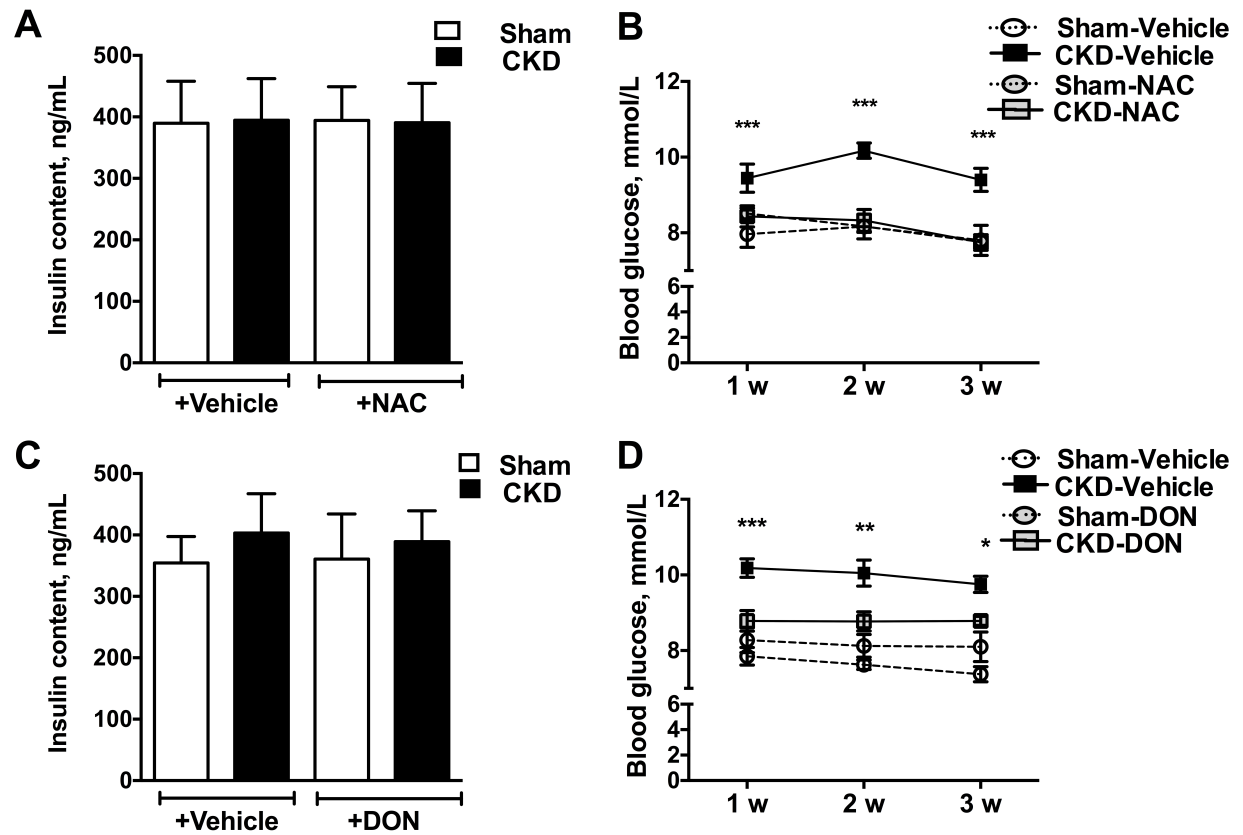

**Figure S4: Islet insulin content and fed blood glucose levels in CKD and sham mice  $\pm$  NAC or DON treatment. (A)** Islet insulin content and **(B)** fed blood glucose in CKD mice  $\pm$  NAC treatment (n=6-8). **(C)** Islet insulin content and **(D)** fed blood glucose and in CKD mice  $\pm$  DON treatment (n=5-8). Data are mean  $\pm$  S.E.M., \*p<0.05, \*\*p<0.01, \*\*\*p<0.001 vs. vehicle; one way-ANOVA Bonferroni post hoc test.

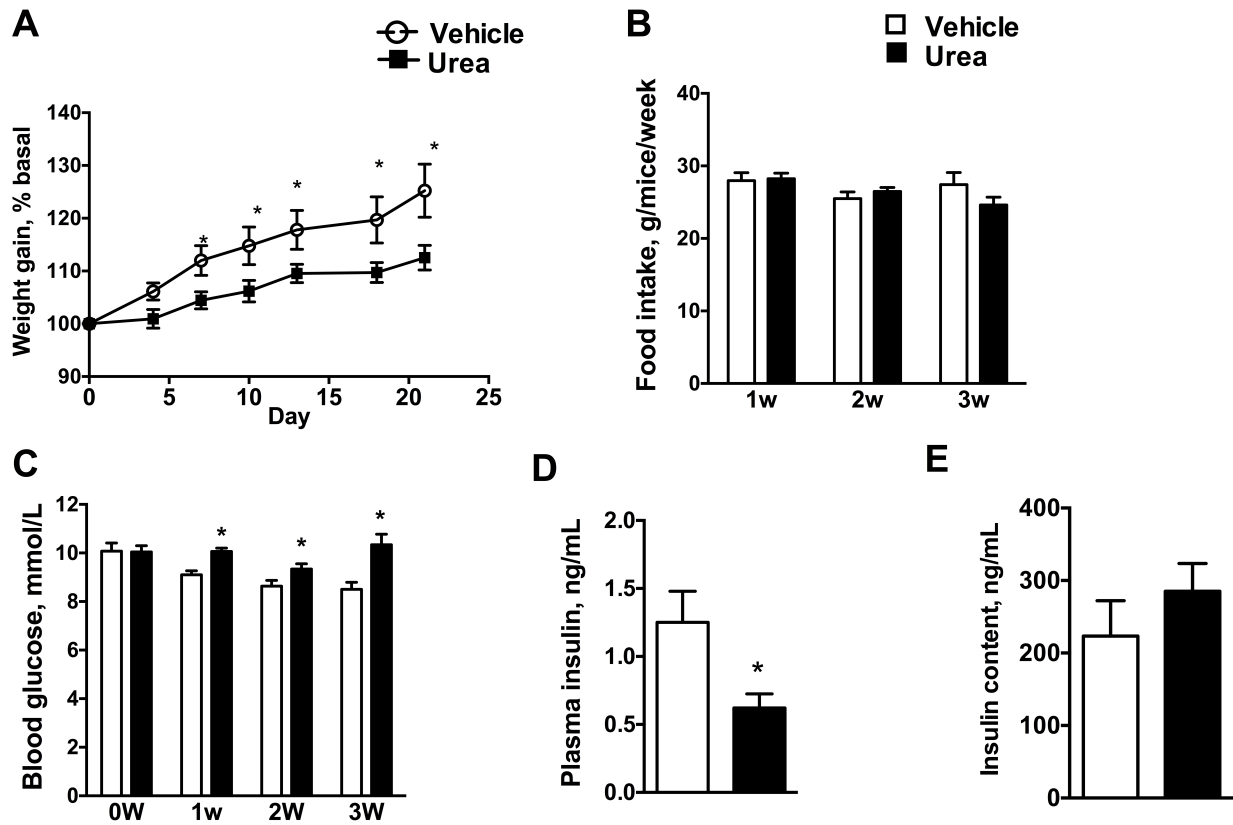

**Figure S5: Body weight, food intake, metabolic parameters, and islet insulin content from normal mice  $\pm$  urea administration.** (A) Percentage of weight gain and (B) total food intake in normal mice  $\pm$  urea administration (n=8-10) (C) Fed blood glucose (8-10) and (D) Fed plasma insulin in normal mice  $\pm$  urea (n=3-4). (E) Islet insulin content after 3 weeks in mice  $\pm$  urea (n=6). Data are mean  $\pm$  S.E.M., \*p<0.05, vs. vehicle; two-way ANOVA Bonferroni post hoc test for A, B and C and Student's *t* test for D and E.

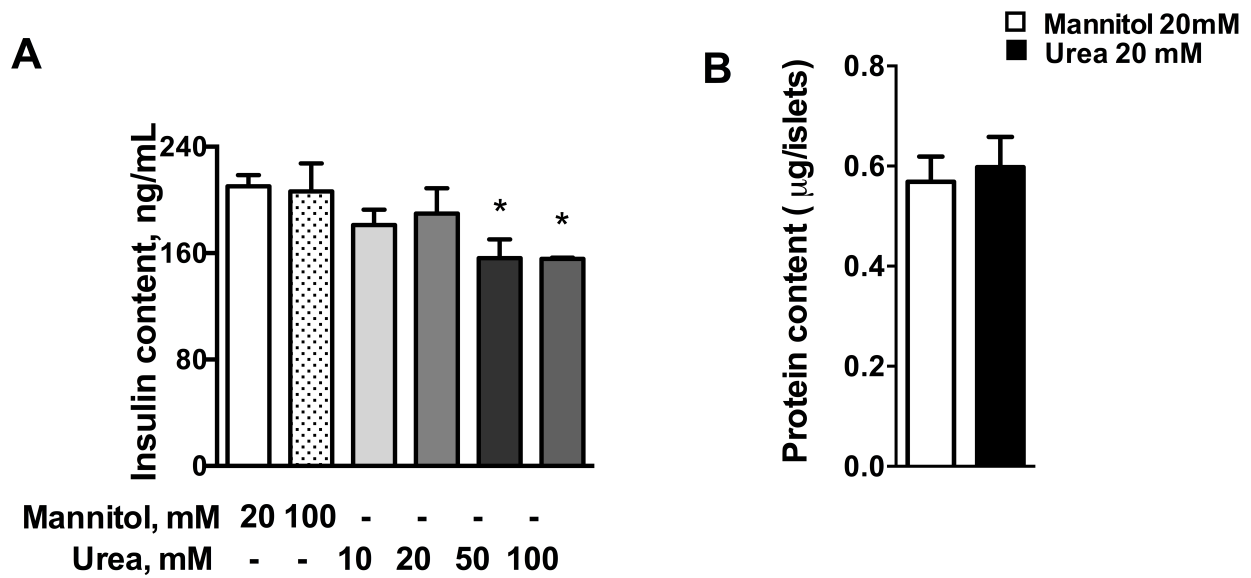

**Figure S6: Insulin and protein content in urea-treated islets.** (A) Islet insulin content from normal mice cultured for 24 h with increasing urea concentrations (n=3-5). (B) Protein content in mannitol- and urea-treated islets (n=4). Data are mean  $\pm$  S.E.M., \*p<0.05; two-way ANOVA, Bonferroni post hoc test for A and Student's *t* test for B.

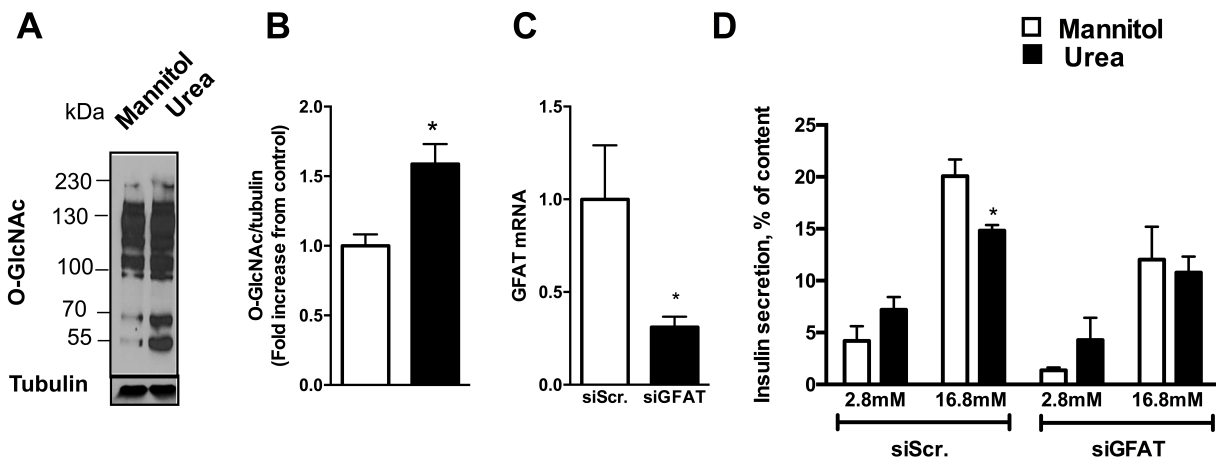

**Figure S7: Islet protein O-GlcNAcylation after urea treatment and insulin secretion after transfection with siGFAT in MIN6 cells.** (A) Representative Western Blot and (B) quantification of total protein O-GlcNAcylation in MIN6 cells  $\pm$  24-h urea (20mmol/L) treatment (n=3). (C) GFAT mRNA levels of MIN6 cells transfected with either scrambled (siScr) or GFAT-1 (siGFAT) siRNAs (n=3). (D) 1-h static insulin incubations of MIN6 cultured for 24 h with urea (20mmol/L) or mannitol (20mmol/L) transfected with either siScr (left) or siGFAT (right) (n=3). Data are expressed as mean  $\pm$  S.E.M., \*p<0.05 vs. mannitol for the same incubation condition; two-way ANOVA for D and Student's *t* test for B and C.

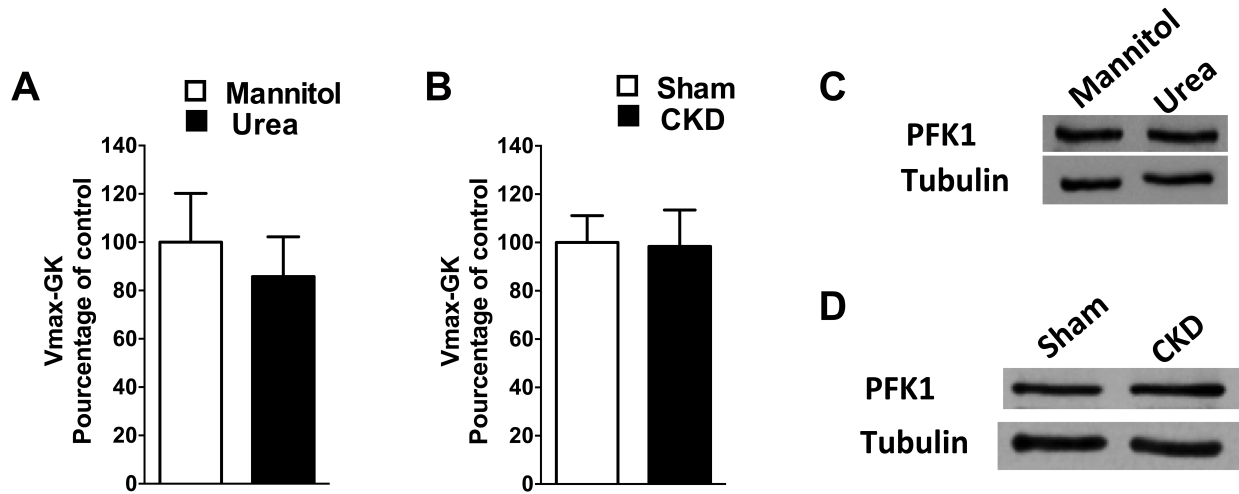

**Figure S8: Glucokinase activity and phosphofructokinase-1 expression in urea-treated and CKD islets.** Glucokinase enzymatic activity in (A) urea-treated and (B) CKD islets (n=3). Immunoblotting for PFK1 protein expression levels in (C) urea-treated islets and (D) CKD islets (representative Western blots of 3 replicate experiments). Data are mean  $\pm$  S.E.M., Student's *t* test.

**Table S1.****Biometry and metabolic parameters in sham and CKD mice  $\pm$  NAC treatment for 3 weeks**

|                             | Sham-Vehicle   | CKD-Vehicle     | Sham-NAC        | CKD-NAC         |
|-----------------------------|----------------|-----------------|-----------------|-----------------|
| Mice (n)                    | 6              | 7               | 10              | 10              |
| <b>Biometry</b>             |                |                 |                 |                 |
| Body weight, g              | 23.0 $\pm$ 0.6 | 22.0 $\pm$ 0.4  | 24.5 $\pm$ 0.5* | 22.8 $\pm$ 0.4  |
| <b>Metabolic parameters</b> |                |                 |                 |                 |
| Urea, mmol/L                | 11.3 $\pm$ 1.8 | 30.5 $\pm$ 5.1* | 12.3 $\pm$ 1.4  | 30.0 $\pm$ 3.4* |
| Fed glycemia, mmol/L        | 8.2 $\pm$ 1.0  | 9.4 $\pm$ 0.5*  | 7.7 $\pm$ 0.2   | 7.8 $\pm$ 0.2   |
| Fed insulinemia, ng/mL      | 1.5 $\pm$ 0.2  | 0.6 $\pm$ 0.1*  | 1.1 $\pm$ 0.2   | 1.3 $\pm$ 0.3   |

Data are mean  $\pm$  S.E.M.

\*p&lt;0.05 by one-way ANOVA vs. control, Bonferroni post hoc test

**Table S2****Characteristics of human pancreatic tissue donors**

|                 | Urea<br>(mmol/L) | Creatinemia<br>( $\mu$ mol/L) | DFG<br>(mL/min/1.73m <sup>2</sup> ) | Sexe | Age | Cause of death       |
|-----------------|------------------|-------------------------------|-------------------------------------|------|-----|----------------------|
| <b>CKD</b>      | 13               | 209                           | 26                                  | H    | 77  | Sepsis               |
|                 | 11               | 231                           | 16                                  | F    | 88  | Lung cancer          |
|                 | 15               | 160                           | 27                                  | F    | 73  | Sepsis               |
| <b>Controls</b> | 2,9              | 32                            | 115                                 | F    | 63  | Sepsis               |
|                 | 6,9              | 43                            | 98                                  | F    | 72  | Inflammatory disease |
|                 | 5                | 50                            | 103                                 | H    | 72  | Lung cancer          |

**Table S3.****Biometry and metabolic parameters in sham and CKD mice  $\pm$  DON treatment for 3 weeks**

|                             | Sham-Vehicle    | CKD-Vehicle     | Sham-DON       | CKD-DON         |
|-----------------------------|-----------------|-----------------|----------------|-----------------|
| Mice (n)                    | 4               | 6               | 4              | 7               |
| <b>Biometry</b>             |                 |                 |                |                 |
| Body weight, g              | 24.5 $\pm$ 0.6* | 22.5 $\pm$ 0.6  | 24.1 $\pm$ 0.8 | 22.7 $\pm$ 0.3  |
| <b>Metabolic parameters</b> |                 |                 |                |                 |
| Urea, mmol/L                | 11.0 $\pm$ 0.8  | 32.0 $\pm$ 2.2* | 7.9 $\pm$ 1.1  | 26.6 $\pm$ 1.1* |
| Fed glycemia, mmol/L        | 7.4 $\pm$ 0.2   | 9.7 $\pm$ 0.2*  | 8.1 $\pm$ 0.4  | 8.8 $\pm$ 0.1   |

Data are mean  $\pm$  SEM

\*p&lt;0.05 by one-way ANOVA vs. control, Bonferroni post hoc test

**Table S4.****Biometry and metabolic parameters in urea- (25 g/L in drinking water) or vehicle-treated mice**

|                             | Vehicle |   |      | Urea  |   |      | p value |
|-----------------------------|---------|---|------|-------|---|------|---------|
| Mice (n)                    | 6       |   |      | 7     |   |      |         |
| <b>Biometry</b>             |         |   |      |       |   |      |         |
| Body weight, g              | 25.6    | ± | 0.9  | 25.1  | ± | 1.4  | 0.68    |
| <b>Metabolic parameters</b> |         |   |      |       |   |      |         |
| Fed glycemia, mmol/L        | 8.5     | ± | 0.29 | 10.34 | ± | 0.43 | 0.01    |
| Fasted glycemia, mmol/L     | 9.30    | ± | 0.5  | 10.3  | ± | 0.6  | 0.16    |
| Fed insulinemia, ng/mL      | 0.89    | ± | 0.15 | 0.47  | ± | 0.02 | 0.03    |
| Fasted insulinemia, ng/mL   | 0.90    | ± | 0.13 | 0.91  | ± | 0.19 | 0.99    |

Data are mean ± SEM

**Table S5.****Islet donor characteristics**

| Sex   | Age      | BMI      |
|-------|----------|----------|
| 4F/6M | 48.3±4.2 | 28.3±2.3 |

**Table S6.****Antibodies**

|          | Provider    | Reference | Dilution                   |
|----------|-------------|-----------|----------------------------|
| Insulin  | Dako        | A0564     | 1/500                      |
| Tubulin  | Abcam       | Ab4074    | 1/2000                     |
| O-GlcNac | Abcam       | Ab2739    | 1/400 (IHC)<br>1/1000 (WB) |
| 8-OHDG   | Abcam       | Ab62623   | 1/150                      |
| PDX-1    | R&D systems | AF2517    | 1/1000                     |
| PFK-1    | Santa-Cruz  | sc-67028  | 1/250 (WB)                 |
| PFK-1M   | R&D systems | MAB7687   | 1/250 (O-GlcNac)           |
